1 Effects of Short-time Exposure to Atrazine on miRNA  
2 Expression Profiles in the Gonad of Common Carp (*Cyprinus*  
3 *carpio*)

4 Fang Wang, Qian-wen Yang, Wen-Jie Zhao, Qi-Yan Du,  
5 Zhong-Jie Chang\*

6

7 College of Life Science, Henan Normal University, Xinxiang,  
8 Henan 453007, People's Republic of China

9

10 \* Corresponding author. Tel: +86 373 3326340.

11

12 E-mail address: 13837331530@163.com (Z.-J. Chang).

13

14 **ABSTRACT:** MicroRNAs (miRNAs) are endogenous small  
15 non-coding RNAs that negatively regulate gene expression by  
16 targeting specific mRNAs; they are involved in the modulation  
17 of important mRNA networks involved in toxicity. Atrazine is a  
18 known endocrine-disrupting chemical, whose molecular  
19 mechanisms are unknown. In this study, common carp  
20 (*Cyprinus carpio*) gonads at two key developmental stages were  
21 exposed to 0.428 ppb atrazine for 24 h *in vitro*. MiRNA  
22 expression profiles were analysed to identify miRNAs related to

23 gonad development and to reveal the atrazine mechanisms  
24 interfering with gonad differentiation. Atrazine exposure caused  
25 significant alteration of multiple miRNAs. Compared with the  
26 juvenile ovary, more miRNAs were down-regulated in juvenile  
27 testis, some of these down-regulated miRNAs target the steroid  
28 hormone biosynthesis pathway related-genes. Predicted target  
29 genes of differently-expressed miRNAs after exposure to  
30 atrazine were involved in many reproductive biology signalling  
31 pathways. We suggest that these target genes may have  
32 important roles in atrazine-induced reproductive toxicity by  
33 altering miRNAs expression. Our results also indicate that  
34 atrazine can up-regulate aromatase expression through miRNAs,  
35 which supports the hypothesis that atrazine has  
36 endocrine-disrupting activity by altering the expression of genes  
37 of the Hypothalamus-Pituitary-Gonad axis through its  
38 corresponding miRNAs. This study tells us the following  
39 conclusions: 1. Atrazine exposure results in significant  
40 alterations of miRNAs whose predicted target genes are  
41 associated with reproductive processes. 2. In the primordial  
42 gonad, atrazine promoted the expression of early  
43 gonad-determining genes by decreasing specific miRNAs. 3. In  
44 the juvenile gonad, atrazine promoted the biosynthesis of steroid

45 hormones.

46

47 **Keywords:** Atrazine; targeting analysis; microRNA; gonad  
48 development; *Cyprinus carpio*

49

## 50 **INTRODUCTION**

51

52 Sex determination in fish is significantly influenced by  
53 environmental factors, such as temperature, pH, exogenous  
54 hormones, and pollutants (Devlin et al., 2002). Pollutants, such  
55 as pesticides, are potential endocrine disruptors, which even at  
56 very low levels are sufficient to cause developmental and  
57 reproductive alterations in numerous species (Colborn et al.,  
58 1993; Corcoran et al., 2010 ).

59 With the development of agriculture, herbicides are  
60 increasingly used to reduce soil erosion, to avoid the manual  
61 removal of weeds, and to increase crop production rates  
62 (Gianessi & Sankula, 2003). However, the use of pesticides  
63 leads to serious harm to living organisms. Atrazine  
64 (2-chloro-4-ethylamino-6-isopropylamino-1,3,5-triazine) is a  
65 pre-emergent herbicide used on a variety of agricultural crops  
66 including corn, sorghum grass, sugar cane, and wheat (Barr et

67 al., 2007; Eldridge et al., 2008; Solomon et al., 2008). Atrazine  
68 is probably the most widely used herbicide in the world  
69 frequently contaminating potable water supplies (U.S.  
70 Environmental Protection Agency 1994). Atrazine is a suspected  
71 endocrine-disrupting chemical that alters male reproductive  
72 tissues, when animals are exposed during development.

73 Various studies indicate atrazine adversely impacts the  
74 neuroendocrine and reproductive systems, and that it may be a  
75 potential carcinogen (Cooper et al., 2007; Cragin et al., 2011;  
76 Hayes et al., 2010; Freeman et al., 2011). Currently the  
77 epigenetic, genetic, and cellular mechanisms altered by atrazine  
78 exposure are under investigation (Kucka et al., 2012; Karmaus  
79 and Zacharewski, 2015; Pogrmic et al., 2009, Pogrmic-Majkic et  
80 al., 2010, 2014; Wirbisky et al., 2016a,b). Tevera-Mendoza et al.  
81 (2002) showed that atrazine exposure, for as little as 48 h at 21  
82 ppb, resulted in severe gonad dysgenesis in African clawed frogs  
83 (*Xenopus laevis*). Moreover, atrazine induced hermaphroditism  
84 at concentrations of only 0.1 ppb (Hayes et al. 2002). In fish,  
85 atrazine can result in complete feminization of males, as  
86 illustrated by skewed sex ratios in zebrafish (*Danio rerio*),  
87 which have no distinguishable sex chromosomes (Suzawa et al.,  
88 2008).

89 In zebrafish, atrazine exposure during embryonic  
90 development alters MicroRNAs (miRNAs) associated with  
91 angiogenesis, cancer, and neurodevelopment (Sara et al., 2016).  
92 Numerous studies have shown that atrazine has adverse effects  
93 on the neuroendocrine system, primarily affecting the  
94 hypothalamus–pituitary–gonad (HPG) axis. Atrazine decreases  
95 gonadotropin-releasing hormone release, the pre-ovulatory surge  
96 of luteinizing hormone, follicle stimulating hormone, and  
97 prolactin (Cooper et al., 2000; Foradori et al., 2009, 2013;  
98 Weber et al., 2013; Wirbisky et al., 2016a). However, the  
99 mechanism of action of atrazine is not well-understood.

100 MiRNAs are single-stranded, highly conserved, non-coding  
101 RNA molecules of 19–24 nucleotides (nt), which regulate gene  
102 expression at the post-transcriptional level, by targeting specific  
103 sites in the 3' untranslated region of mRNAs (Bartel, 2004; He  
104 et al., 2004; Krol et al., 2010). miRNAs play important roles in  
105 controlling multiple biological processes, such as embryonic  
106 development, cell cycle control, apoptosis, cell proliferation and  
107 differentiation, and immune and stress responses in various  
108 organs (Brennecke et al., 2003; Hwang et al., 2006; Pedersen et  
109 al., 2007; Ro et al., 2007; Xu et al., 2003). In the last few years,  
110 miRNAs have been reported to play an important role in the

111 response to toxicant exposure and in the process of  
112 toxicant-induced tumorigenesis (Jardim et al., 2009; Rager et al.,  
113 2011; Zhang and Pan, 2009).

114 As a new tool for risk assessment, miRNAs can provide  
115 indications on the toxicology mechanisms associated with  
116 environmental factors and with disease. MiRNAs are also novel  
117 biomarkers of the diseases related to environmental factors (Li  
118 et al., 2014). Recently, an increasing number of studies have  
119 shown that miRNAs can functionally interact with a variety of  
120 environmental factors including drugs, viruses, radiation, and  
121 environmental chemicals (e.g., formaldehyde, PAHs, and  
122 bisphenol A) (Izzotti and Pulliero, 2014; Qiu et al., 2012; Ray et  
123 al., 2014). Knowledge on the role miRNAs in toxicological  
124 responses is increasing, but is still limited.

125 The common carp, *Cyprinus carpio*, is one of the most  
126 important cyprinid species, accounting for 10% of the global  
127 freshwater aquaculture production (Xu et al., 2014). Genomic  
128 studies of common carp have recently made extensive progress.  
129 Common carp transcriptome was deep sequenced by Ji et al.  
130 (2012) and Jiang et al. (2016), who identified changes at the  
131 transcriptomic level in common carp spleen after 24 h of  
132 experimental infection with *Aeromonas hydrophila*. A large

133 number of gene associated single-nucleotide polymorphisms  
134 (SNPs) were identified in four strains of common carp using  
135 nextgeneration sequencing (Xu et al., 2014). miRNAs and  
136 miRNA-related SNPs were also identified. MiRNA-related  
137 SNPs affect biogenesis and regulation in the common carp (Zhu  
138 et al., 2012).

139 Yellow River carp (common carp from the Yellow River) is  
140 famous in China for its tender, tasty, and nutritional meat.  
141 Females grow faster than males, which makes the mechanism of  
142 sex differentiation and development an intriguing topic in this  
143 commercially important species (Gui et al., 2012; Mei and Gui,  
144 2015). In our previous study, we profiled miRNAs from five  
145 different developmental stages of Yellow River carp, in order to  
146 identify differentially-expressed and novel miRNAs that may  
147 play regulatory roles in ovary differentiation (Wang et al., 2017).  
148 Our previous study showed that there is a dynamic shift in gene  
149 expression during gonad differentiation and development. (Jia et  
150 al., 2017). Environmental factors can affect miRNAs in fish, and  
151 even play a decisive role in some species.

152 Several studies have shown that in zebrafish and humans  
153 atrazine exposure alters miRNAs associated with angiogenesis,  
154 cancer, and neurological development (Wirbisky et al., 2016).

155 However, few studies have investigated the role of miRNAs in  
156 toxicological responses during sex differentiation and  
157 development in teleost fish.

158 In this study, we looked for correlations of miRNA and  
159 mRNA expressions during sex differentiation and development  
160 of carp, following atrazine exposure. The gonad development of  
161 carp has several critical periods, including primordial gonad and  
162 juvenile gonad. It would be valuable to understand the gene  
163 expression changes and the roles of miRNAs during the key  
164 stages of gonad development of carp, when they are exposed to  
165 atrazine. Therefore we aimed to investigate the effect of atrazine  
166 exposure on the global expression profile of miRNAs in the two  
167 key stages of gonad development by deep sequencing. We also  
168 predicted target genes that would affect gonad development. Our  
169 results would help us to better understand the molecular  
170 mechanisms of atrazine toxicity on gonad development, and to  
171 reveal the roles of miRNA–mRNA interactions in toxicological  
172 mechanisms, and the important impact on sex differentiation and  
173 gonad development of common carp.

174

## 175 **MATERIALS AND METHODS**

### 176 **Chemicals**



177 Atrazine (purity > 98%) was purchased from Beijing  
178 Dezhong-Venture Pharmaceutical Technology Development Co.,  
179 Ltd. (Beijing, China). As atrazine has low solubility in water, the  
180 stock solutions and dilutions were prepared in acetone (Fisher  
181 Scientific, USA) and stored at 4 °C.

182

### 183 **Fish Samples**

184 All investigations in this study were performed according to the  
185 Animal Experimental Guidelines of the Ethical Committee of  
186 the University of China. The Yellow River carp used in this  
187 study were obtained from the aquaculture facilities of Henan  
188 Normal University and maintained at the genetics laboratory  
189 (Henan normal university, Xinxiang Henan province, China) in  
190 flow-through water tanks with a constant temperature of  $25 \pm$   
191  $1$  °C. The test samples included gonads from two different  
192 developmental stages. Samples of primordial gonads were  
193 collected from larvae at 45 days post-hatching, based on the  
194 results of our previous studies (Wang et.al, 2017). The original  
195 reproductive gland was dissected under a microscope, and  
196 samples from 50 fish were mixed after confirmation by  
197 histological section. Samples of juvenile gonad were collected  
198 from 30 fish 80 days post-hatching. Stage II ovaries and testis

199 were confirmed with histological sections.

200

### 201 **Atrazine Exposure**

202 Samples of two different stages including primordial gonad and  
203 juvenile gonad (ovary and testis) were cultured at 28 °C in a  
204 humidified 10% CO<sub>2</sub> atmosphere in Dulbecco's modified eagle  
205 medium supplemented with 10% foetal bovine serum (Gibco,  
206 Life Technologies) (Pombinho et al., 2004; Daniel et al., 2014).  
207 Culture medium was renewed every two days. For atrazine  
208 exposure experiments, cells were seeded in 24-well plates and  
209 allowed to proliferate for 48 h. Then samples were treated with  
210 0.428 ppb of atrazine for 24 h. Three replicates were set for each  
211 treatment, as well as for the unexposed control. Samples were  
212 collected at 8 h and 24 h post-treatment, and were immediately  
213 frozen in liquid nitrogen and stored at -80 °C for further use.

214

### 215 **RNA Isolation**

216 Total RNA was extracted from each sample separately using  
217 TRIzol reagent (Invitrogen, Carlsbad, CA, USA) following the  
218 manufacturer's protocol. The quantity and purity of total RNA  
219 were checked using the Agilent 2100 Bioanalyzer system (Santa  
220 Clara, CA, USA) and by denaturing gel electrophoresis. The

221 samples were then stored at  $-80^{\circ}\text{C}$ .

222

### 223 **Small-RNA Library Construction and Sequencing**

224 We generated small-RNA libraries from the nine samples from  
225 Yellow River carp: primordial gonad control (PG-CK),  
226 primordial gonad exposed to atrazine for 8 h (PG-A8h),  
227 primordial gonad exposed to atrazine for 24 h (PG-A24h),  
228 juvenile ovary control (IIC-CK), juvenile ovary exposed to  
229 atrazine for 8 h (IIC-A8h), juvenile ovary exposed to atrazine  
230 for 24 h (IIC-A24h), juvenile testis control (IIX-CK), juvenile  
231 testis exposed to atrazine for 8 h (IIX-A8h), juvenile testis  
232 exposed to atrazine for 24 h (IIX-A24h). Small-RNA libraries  
233 were generated using the mirVana<sup>TM</sup> mircoRNA Isolation Kit  
234 (Ambion, USA), according to the manufacturer's instructions.  
235 Small-RNA libraries were prepared from three biological  
236 replicates for each sample.

237 Total RNA was ligated with 3' and 5' RNA adaptors. Fragments  
238 with adaptors on both ends were enriched by PCR after reverse  
239 transcription, as described previously (Wang et al., 2017). The  
240 resulting cDNAs were purified and enriched with 6% denaturing  
241 polyacrylamide gel electrophoresis to isolate the fractions of the  
242 expected size and to eliminate unincorporated primers, primer

243 dimer products, and dimerized adaptors (Wang et al., 2017).  
244 Finally, the nine resulting RNA libraries were sequenced using  
245 an Illumina/Solexa Genome Analyzer, at Guangzhou  
246 Genedenovo Biotech Company (Guangzhou, China).

247

## 248 **Sequencing Data Analysis**

249 As we described previously (Wang et Al., 2017), the raw  
250 sequence data were filtered to remove low quality reads and  
251 adaptor sequences. After adaptor trimming, reads of 16–35 nt in  
252 length were kept for further bioinformatic analysis. The  
253 remaining reads were mapped to the *C. carpio* genome with a  
254 tolerance of zero mismatches in the seed sequence using Bowtie  
255 (version 1.1.0). Sequences mapping to the genome were kept for  
256 further analysis. The reads mapped to the *C. carpio* genome  
257 were subsequently analysed to annotate rRNA, tRNA, snRNA,  
258 snoRNA, and non-coding RNA sequences by blasting against  
259 the Rfam (11.0, <http://rfam.xfam.org>) and GenBank  
260 (<http://www.blast.ncbi.nlm.nih.gov/>) databases. The remaining  
261 sequences were identified as the conserved miRNAs in carp by  
262 blasting against miRBase 21.0 allowing no more than two  
263 mismatches. Existing carp miRNAs referring to *C. carpio*  
264 miRNA were included in the miRBase with no base mismatch.

265 The sequences that did not match existing or conserved  
266 miRNAs were used to identify potentially novel miRNA  
267 candidates (Griffiths-Jones, 2006; Pearson, 1991). Novel  
268 miRNA candidates were identified by folding the flanking  
269 genome sequence of unique small RNAs using MIREAP  
270 (<https://sourceforge.net/projects/mireap/>). The enrichment level  
271 of each miRNA was identified by counting the number of reads  
272 in each sample. To identify differentially-expressed miRNAs  
273 within the nine libraries, the frequency of miRNA counts was  
274 normalized as transcripts per million (TPM). The TPM values  
275 were calculated as follows: normalized expression,  $TPM =$   
276  $(\text{actual miRNA count} / \text{number of total clean reads}) \times 1,000,000$ .  
277 Only the miRNAs with over 2-fold changes in the two compared  
278 samples were considered differentially-expressed miRNAs ( $P <$   
279  $0.05$ ) (Audic et al., 1997). A positive value represents  
280 up-regulation of a miRNA, while a negative value indicates  
281 down-regulation.

282

### 283 **Prediction of miRNA Targets**

284 Target genes of miRNAs were predicted using RNAhybrid  
285 (v2.1.2) + svm light (v6.01), miRanda (v3.3a) and Targetscan  
286 software. The overlap of the predicted results from the three

287 programs was considered to represent the final result of  
288 predicted target mRNAs.

289

## 290 **Gene Ontology (GO) and Pathway Analysis of** 291 **Atrazine-Responsive mRNA Targets**

292 Pathway analysis of the predicted target mRNAs was performed  
293 using the Kyoto Encyclopedia of Genes and Genomes (KEGG)  
294 pathway database (<http://www.genome.jp/kegg/pathway.html>)  
295 (Kanehisa et al., 2008). To classify the selected genes into  
296 groups with similar patterns of expression, each gene was  
297 assigned to an appropriate category, according to its main  
298 cellular function. To determine the biological phenomena target  
299 mRNAs were involved in, the DAVID  
300 (<http://david.abcc.ncifcrf.gov/home.jsp>) functional annotation  
301 clustering tool was used.

302

## 303 **QPCR for Validation of miRNAs**

304 The expression profiles of six randomly-selected miRNAs were  
305 investigated with qRT-PCR to validate their expression changes.  
306 Total RNA (500 ng) was converted to cDNA using miScript  
307 reverse transcriptase mix (Qiagen, Valencia, CA, USA)  
308 according to the manufacturer's instructions. QRT-PCR was

309 carried out using an Applied Biosystems 7300 Real-Time PCR  
310 System according to the standard protocol. CDNA samples were  
311 diluted to 1:150; 5  $\mu$ L were used for each real-time PCR  
312 reaction. The 20- $\mu$ L PCR mixture included 10  $\mu$ L SYBR Premix  
313 Taq (2 $\times$ ), 0.4  $\mu$ L miRNA-specific forward primers (10  $\mu$ M), 0.4  
314  $\mu$ L miScript universal primer (10  $\mu$ M), and 1  $\mu$ L PCR template  
315 (cDNA). The PCR thermal program was 50  $^{\circ}$ C for 2 min,  
316 followed by 40 cycles of 95  $^{\circ}$ C for 2 min, 95  $^{\circ}$ C for 15 s, and  
317 60  $^{\circ}$ C for 30 s. Melting curve analysis was performed after  
318 amplification. Standard curves for endogenous control and for  
319 all miRNAs were constructed using serial dilutions of a pooled  
320 cDNA sample. Standard curves were used to determine the  
321 quantity of the selected miRNAs and reference genes. Relative  
322 miRNA expression levels were calculated using the  $2^{-\Delta\Delta C_t}$   
323 method. Each sample was run in triplicate. SnRNA U6 was used  
324 as an endogenous control for QPCR of miRNAs.

325

## 326 **RESULTS**

### 327 **Construction of cDNA Libraries for Sequencing and** 328 **Small-RNA Discovery**

329 We constructed nine cDNA libraries of small RNAs using  
330 pooled total RNAs from gonad tissues exposed to atrazine or

331 control tissues collected from primordial gonad (PG) and from  
332 juvenile gonad stage carps. After filtering out low quality  
333 sequences, 5' and 3' adapters, and reads < 18 nt, A total of  
334 10,281,292, 10,086,295, 11,985,647, 10,080,133, 11,724,632,  
335 11,604,659, 11,502,749, 11,030,073, and 11,282,882 clean reads  
336 were obtained from the nine libraries. Solexa sequencing was  
337 then performed for further analysis (Table 1). After comparing  
338 the small-RNA sequences with NCBI GenBank and RFam, we  
339 removed known types of RNA sequences including rRNA (3.84,  
340 8.80, 8.84, 41.84, 16.31, 5.34, 0.85, 4.42 and 50.12%,  
341 respectively), small nuclear RNA (snRNA), small nucleolar  
342 RNA (snoRNA), and tRNA (2.16%; 1.84%; 1.08%; 0.47%;  
343 1.08%; 2.72%; 0.58%; 2.79%; and 0.37%), and repeat  
344 sequences. Because the genome of common carp is available,  
345 the clean reads of small RNAs from the nine libraries were  
346 mapped to the common carp genome with miRDeep2 software.  
347 A total of 4,895,831 (82.84%); 4,657,428 (84.16%);  
348 7,083,013(84.91%); 5,536,128 (90.12%); 6,104,227 (86.69%);  
349 5,627,337 (82.83%); 5,334,147 (79.12%); 5,337,365 (79.15%)  
350 and 7,463,759 (89.37%) of miRNA clean reads were mapped to  
351 the common carp genome. The length distribution of the  
352 high-quality reads had different trends in the samples within the



353 nine libraries. In the case of PG-CK samples, two peaks of  
354 length were observed at 22 nt and 27 nt. However, the size  
355 distribution of 21–23 nt increased and the size distribution of  
356 26–29 nt decreased, after exposed to atrazine for 8 h and 24 h  
357 (Fig. 1). In the case of IIX-CK samples, higher miRNA mapped  
358 rates were observed in small RNAs of 26–28 nt in length. The  
359 size distribution of 21–23 nt increased and the size distribution  
360 of 26–29 nt decreased after exposure to atrazine for 8 h and 24 h  
361 (Fig. 1). In the case of IIC-CK samples, higher miRNA mapped  
362 rates were observed in small RNAs of 21–23 nt in length. The  
363 size distribution of 21–23 nt decreased and the size distribution  
364 of 27–29 nt increased after exposure to atrazine for 8 h and 24 h  
365 (Fig. 1). MiRNAs in small RNAs of 26–29 nt in length  
366 corresponded to Piwi-interacting RNAs (piRNAs) (Fig. 1),  
367 which are endogenous small non-coding RNA molecules 26–31  
368 nt in length. Various studies have shown that Piwi–piRNA  
369 complexes are essential in gene silencing and in transposon  
370 regulation during germ cell differentiation and gonad  
371 development in animals (Klattenhoff and Theurkauf, 2008;  
372 Grentzinger et al., 2012; Kawaoka et al., 2012).

373

## 374 **Identification of miRNAs**

375 To identify miRNAs in the gonad of the Yellow River carp  
376 exposed or not to atrazine, the clean reads were used and the  
377 miRNAs identified by comparison to the deposited miRNAs  
378 from miRBase. Mireap\_v0.2 software was used for secondary  
379 structure prediction of novel miRNA. There was a total of 4,443  
380 miRNAs that were identified, including 3795 existing miRNAs,  
381 and 648 conserved miRNAs. Among the existing and conserved  
382 miRNAs, 7 miRNAs (ccr-miR-26a, ccr-miR-10b, ccr-miR-143,  
383 ccr-miR-181a, ccr-miR-100, ccr-miR-22a, and ccr-miR-92a)  
384 were the most abundant (TPM > 10,000) in all samples (TPM =  
385  $\text{Readout} \times 1,000,000 / \text{Mapped reads}$ ).

### 386 **Validation of miRNAs with qRT-PCR**

387 To validate the results of Solexa sequencing, qRT-PCR was used  
388 to test six randomly-selected (ccr-miR-24, ccr-miR-146a,  
389 ccr-miR-192, ccr-miR-21, ccr-miR-143, and ccr-miR-454b)  
390 miRNAs. According to sequence analysis, from the miRNAs  
391 selected for comparison, three miRNAs (ccr-miR-146a,  
392 ccr-miR-21, and ccr-miR-454b) were up-regulated in juvenile  
393 ovary gonad at 24 h whereas three miRNAs (ccr-miR-24,  
394 ccr-miR-192, and ccr-miR-143) were down-regulated in juvenile  
395 ovary at 24 h of atrazine exposure. The relative expression  
396 levels of all six miRNAs were consistent with the sequencing

397 data (Fig. 2), indicating the reliability of the miRNA expression  
398 and correlation analysis based on small-RNA sequencing.

399

## 400 **Effects of Atrazine Exposure on miRNA Expression in PG of** 401 **Yellow River Carp**

402 Primordial gonad is a crucial stage of sex differentiation,  
403 because of the formation of primordial germ cell. A comparative  
404 analysis of miRNA expression profiles with or without atrazine  
405 exposure may reveal miRNAs with important roles in early  
406 gonad differentiation. The results showed that atrazine exposure  
407 resulted in the altered expression of a larger number of miRNAs  
408 in PG compared with control. Atrazine exposure not only  
409 affected the total number of detectable miRNAs, but also the  
410 expression levels of miRNAs. After atrazine exposure for 8 h  
411 and 24 h, we observed different patterns of  
412 differentially-expressed miRNAs in PG of carp. Compared with  
413 the control group, 277 miRNAs were up-regulated and 334  
414 miRNAs were down-regulated after atrazine exposure for 8 h. A  
415 significant difference in miRNA expression was observed  
416 between samples from atrazine exposure for 24 h and unexposed  
417 controls, 181 miRNAs were up-regulated and 1,056 miRNAs  
418 were down-regulated (Fig. 3). The most significantly

419 down-regulated miRNAs were miR-205, miR-184 and  
420 miR-203b-3p, which were down-regulated by 7.15, 3.61 and  
421 3.35 fold, respectively. The most significantly up-regulated  
422 miRNAs were miR-7132, miR-135c, and miR-187 which were  
423 up-regulated by 8.70, 2.88 and 2.48 fold, respectively (Table 2).  
424 Atrazine exposure for 24 h had a greater effect on carp PG  
425 miRNA expression than the exposure for 8 h. The number of  
426 miRNAs with altered expression after atrazine exposure was  
427 higher at 24 h than at 8 h. However, the extent of change varied  
428 among the miRNAs. For example, the expression levels of  
429 miR-135c and miR-738 increased significantly (2.21- and  
430 2.47-fold, respectively), whereas the expression levels of  
431 miR-203a decreased significantly (12.0-fold). Similarly, the  
432 changes in miRNA expression in PG varied between the  
433 unexposed control and atrazine exposure for 8 h or 24 h. For  
434 example, miR-135c was up-regulated by 2.2-fold after atrazine  
435 exposure for 8 h and was up-regulated by 2.8-fold after atrazine  
436 exposure for 24 h. MiR-122 was up-regulated by 1.4-fold after  
437 atrazine exposure for 8 h, but was down-regulated by 2.9-fold  
438 after atrazine exposure for 24 h. The miRNAs that were  
439 significantly altered in PG after exposure to atrazine may thus  
440 be involved in sex differentiation and development, and their

441 importance in sex differentiation mechanisms needs to be  
442 clarified.

443

## 444 **Effects of Atrazine Exposure on miRNA Expression in** 445 **Juvenile Gonad of Yellow River Carp**

446 We observed patterns of differentially-expressed miRNAs in  
447 juvenile gonad (stage II ovary and stage II testis) of carp after  
448 atrazine exposure for 8 h and 24 h, especially in juvenile ovary  
449 (Fig. 3). In juvenile ovary, 1053 miRNAs were up-regulated and  
450 132 miRNAs were down-regulated after atrazine exposure for 8  
451 h, relative to unexposed controls. Relative to the control group,  
452 1085 miRNAs were up-regulated and 84 miRNAs were  
453 down-regulated after atrazine exposure for 24 h. The most  
454 significantly down-regulated miRNAs were miR-184, miR-214  
455 and miR-122, which were down-regulated by 13.69, 13.21 and  
456 12.40 fold respectively. The most significantly up-regulated  
457 miRNAs were miR-17-3p, miR-454a, and miR-454b which  
458 were up-regulated by 2.95, 2.49 and 2.42 fold respectively. In  
459 juvenile testis, 561 miRNAs were up-regulated and 434  
460 miRNAs were down-regulated after atrazine exposure for 8 h,  
461 relative to the control group. Compared with the control group,  
462 775 miRNAs were up-regulated and 799 miRNAs were

463 down-regulated after atrazine exposure for 24 h. The most  
464 significantly down-regulated miRNAs were miR-205, miR-194,  
465 and miR-122, which were down-regulated by 14.27, 13.59, and  
466 11.81 fold, respectively. The most significantly up-regulated  
467 miRNAs were miR-489, miR-738, and miR-193a, which were  
468 up-regulated by 10.61, 4.53, and 2.50 fold, respectively.  
469 Atrazine exposure for 24 h had a greater effect on juvenile testis  
470 miRNA expression than 8 h exposure. In addition, atrazine  
471 treatment led to a larger number of miRNAs with altered  
472 expression in juvenile testis, than in juvenile ovary. The number  
473 of down-regulated miRNAs was higher in juvenile testis than in  
474 ovary which is consistent with the feminizing effects of atrazine.

475 The extent of expression change varied among miRNAs. For  
476 example, in juvenile ovary, the miR-301a and miR-17-3p  
477 expression levels decreased by 1.38- and 2.95-fold after atrazine  
478 exposure for 24 h, respectively. In contrast, the miR-101b  
479 expression level decreased by 1.01-fold. In juvenile testis, the  
480 miR-193a and miR-146a expression levels increased by 2.50-  
481 and 1.71-fold, respectively, after atrazine exposure for with 24 h.  
482 In contrast, the miR-122 expression levels decreased by  
483 11.81-fold. Similarly, the changes in miRNA expression of  
484 juvenile ovary and testis varied between unexposed controls and

485 atrazine exposure for 8 h or 24 h. For example, ccr-miR-210 was  
486 down-regulated by 1.36-fold after atrazine exposure for 8 h, and  
487 was down-regulated by 2.06-fold after atrazine exposure for 24  
488 h in juvenile ovary. Ccr-miR-192 was down-regulated by  
489 3.12-fold after atrazine exposure for 8 h, and was  
490 down-regulated by 4.07-fold after atrazine exposure for 24 h  
491 (Table 2). In juvenile testis, ccr-miR-205 was down-regulated by  
492 3.50-fold after atrazine exposure for 8 h but was down-regulated  
493 by 14.27-fold after atrazine exposure for 24 h (Table 2). The  
494 miRNAs that were significantly altered in juvenile gonad after  
495 exposure to atrazine may thus be involved in sex differentiation  
496 and development, and their importance in sex differentiation  
497 mechanisms needs to be clarified.

498

## 499 **Expression Patterns of miRNAs at Different Gonad** 500 **Developmental Stages in Yellow River Carp**

501 Trend analysis of miRNA expression after exposure to atrazine  
502 for 8 h and 24 h, at different developmental stages, was  
503 conducted. In PG, we identified eight different expression  
504 patterns (Fig. 4), including 25 miRNAs that were up-regulated  
505 and 214 that were down-regulated during atrazine exposure (Fig.  
506 4, profiles 3, 0). Expression of 232 miRNAs, such as miR-1 and

507 miR-133a-3p, increased after exposure for 8 h, but decreased at  
508 24 h (Fig. 4, profile 5). In contrast, 129 miRNAs, including  
509 miR-29a and miR-29b, showed the opposite expression pattern  
510 during atrazine exposure (Fig. 4, profile 2). In juvenile ovary, 8  
511 different expression patterns (Fig. 4) were identified, including  
512 440 miRNAs that were up-regulated and 26 that were  
513 down-regulated during atrazine exposure (Fig. 4, profiles 7, 0).  
514 Expression of 157 miRNAs, such as mir-202-y and mir-27c-5p,  
515 increased after exposed for 8 h, but decreased at 24 h (Fig. 4,  
516 profile 5). In contrast, 70 miRNAs, including miR-155 and  
517 miR-92b, showed the opposite expression pattern during  
518 atrazine exposure (Fig. 4, profile 2). In juvenile testis, we also  
519 identified eight different expression patterns (Fig. 4), including  
520 68 miRNAs that were up-regulated and 73 that were  
521 down-regulated during exposure (Fig. 4, profiles 7, 0).  
522 Expression of 117 miRNAs, such as mir-15a and mir-16a,  
523 increased after atrazine exposure for 8 h, but decreased at 24 h  
524 (Fig. 4, profile 5). In contrast, 41 miRNAs, including miR-144  
525 and miR-148, showed the opposite expression pattern during  
526 atrazine exposure (Fig. 4, profile 2).

527 In this study, miRNAs targeting male-biased genes showed an  
528 upward trend. In PG, miR-499, which was predicted to target



529 *sox9*, increased after exposure to atrazine (Fig. 4, profile 7).  
530 *Gsdf* was the predicted target of miR-146a and of miR-22a,  
531 which also increased after exposure to atrazine (Fig. 4 profile 7).  
532 The expression profiles of miR-72-x and miR-212-y, which  
533 were predicted to target *dmrt*, were also consistent with the  
534 above miRNAs which predicted male-biased target genes (Fig. 4,  
535 profile 7). In juvenile ovary, novel-m3245-5p, which was  
536 predicted to target *sox9*, increased after exposure to atrazine (Fig.  
537 4, profile 7). *Gsdf* was the predicted target of novel-m0192-3p  
538 and novel-m0514-3p, which also increased after exposure to  
539 atrazine (Fig. 4, profile 7). MiR-454a and miR-454b, which  
540 were predicted to target *atm*, increased after exposure to atrazine  
541 (Fig. 4, profile 7). The expression profiles of novel-m0515-3p  
542 and novel-m0080-5p, which were predicted to target *dmrt*, were  
543 also consistent with the above miRNAs which predicted  
544 male-biased target genes (Fig. 4, profile 18). In juvenile testis,  
545 novel-m3312-3p, which is predicted to target *sox9*, increased  
546 after exposure to atrazine (Fig. 4, profile 7). *Atm*, which was the  
547 predicted target of novel-m0167-3p and novel-m0417-3p, also  
548 increased after exposure to atrazine (Fig. 4, profile 7).

549 In contrast, miRNAs targeting female-biased genes showed a  
550 downward trend. Expression levels of novel-m0101-3p and

551 novel-m3450-3p in PG, miR-101b in juvenile ovary, and  
552 miR-203b-3p in juvenile testis, all of which were predicted to  
553 target *Smad4*, decreased after exposure to atrazine (Fig. 4,  
554 profile 0). The most abundant differentially-expressed miRNAs  
555 after exposure to atrazine in PG, juvenile ovary and juvenile  
556 testis were let-7a, miR-143, and miR-125b, all of which  
557 decreased significantly during atrazine exposure.

558 These results suggest that these miRNAs may influence gonad  
559 development.

560

## 561 **Identification and Signalling Analysis of Target Genes of** 562 **Differentially-Expressed miRNA**

563 To identify potential targets of differentially-expressed miRNAs,  
564 involved in sex differentiation and development after atrazine  
565 exposure, we performed target-gene prediction based on the  
566 common carp (*C. carpio*) genome sequence  
567 (<http://www.carpbase.org/>). A total of 26,299 genes were  
568 predicted to be the possible targets of 4353  
569 differentially-expressed miRNAs that were commonly  
570 expressed in all atrazine exposure samples. Functional  
571 annotation using KEGG identified 239 annotated signalling  
572 pathways, including at least 11 pathways involved in

573 reproductive biology: transforming growth factor- $\beta$  (*TGF- $\beta$* )  
574 signalling, *Wnt* signalling, oocyte meiosis, mitogen-activated  
575 protein kinase (*MAPK*) signalling, Notch signalling, p53  
576 signalling, gonadotropin-releasing hormone (*GnRH*) signalling,  
577 RNA polymerase, steroid hormone biosynthesis, estrogen  
578 signalling pathway, and metabolism of xenobiotics by  
579 cytochrome P450. Interestingly, the target genes of 790  
580 miRNAs belonged to the *MAPK* signalling pathway, which  
581 plays an important part in virtually every step of  
582 spermatogenesis in the testis. The *MAPK* signalling pathway is  
583 also involved in the acrosome reaction in the female  
584 reproductive tract before fertilization of the ovum (Huang et al.,  
585 2011). *Wnt* signalling is known to be involved in mammalian  
586 reproduction (Kobayashi et al., 2011), and in zebrafish sex  
587 determination (Chang et al., 2013). We detected 415 miRNA  
588 targets belonging to the *Wnt* signalling pathway, 30 belonging to  
589 *NF-kappa B* signalling pathway, and 133 belonging to p53  
590 signalling pathway. *Wnt* signalling pathway, *NF-kappa B*  
591 signalling pathway and p53 signalling pathways were associated  
592 with sex differentiation in zebrafish (Chang et al., 2013). Target  
593 genes predicted to belong to the three pathways in our study  
594 may be involved in sex differentiation and gonad development

595 in Yellow River carp. Moreover, we identified 245 miRNA  
596 targets belonging to the *TGF- $\beta$*  signalling pathway, and 179  
597 belonging to the Notch signalling pathway. In addition, we also  
598 identified 31 miRNA targets belonging to oestrogen signalling  
599 pathway, which may play an important role in hormone  
600 regulation.

601 To determine the key biological process of the putative target  
602 genes related to atrazine exposure, GO analysis was performed.  
603 The identified biological processes that the putative target genes  
604 were classified into include reproduction, reproductive process,  
605 response to stimulus, developmental process, and growth, which  
606 were all mechanisms related to sex differentiation and gonad  
607 development. The results showed possible relationships between  
608 atrazine, putative targets and gonad development, and suggested  
609 that atrazine may have effect on sex differentiation and gonad  
610 development.

611 We analysed the relationships between  
612 differentially-expressed miRNAs and their putative target genes.  
613 *Foxl2*, *stat1*, *sfl*, *dmrt* and *gsdf* have been shown to be key  
614 factors in early ovary differentiation (Ijiri et al., 2008;  
615 Nagahama et al., 1997). We also analysed *smad3*, *smad4*, *sox9*,  
616 and *atm*, which are also known to be responsible for gonad

617 differentiation. We found that these genes were predicted targets  
618 of many miRNAs, which could thus negatively regulate these  
619 target genes. Given the important roles of steroid hormones in  
620 reproduction and sexual dimorphism in fish, we analysed the  
621 relationships between miRNAs, including *hsd11b* and *hsd3b*  
622 (which encode key enzymes in the steroid hormone biosynthesis  
623 pathway), mRNAs, and the steroid hormone biosynthesis  
624 pathway. Atrazine has endocrine-disrupting effects by altering  
625 the HPG axis (Trentacoste et al., 2001). We analysed genes that  
626 have critical roles in the regulation of the HPG axis including  
627 *ER1*, *ER2*, *AR*, and *CYP19A1*.

628 In the PG, a higher number of miRNAs targeting  
629 female-biased genes were down-regulated. MiR-135c which  
630 was significantly down-regulated by 2.21-fold and 2.88-fold  
631 after exposure to atrazine for 8 h and 24 h, respectively, were  
632 predicted to target *ER*, *foxl2*, and *CYP19A*. *Gsdf* was the  
633 predicted target of miR-132a, miR-146a, miR-210, and miR-22a  
634 which were also down-regulated. Our results indicated that  
635 atrazine can promote early gonad-determining genes by  
636 down-regulating miRNAs. miR-205, which was predicted to  
637 target *atm*, *EGF*, *bcl2*, *BMP1* (bone morphogenetic protein 1),  
638 was significantly up-regulated by 7.23-fold for 8 h and 7.15-fold

639 for 24 h, respectively. miR-132a, which targeted *dmrt2*, was  
640 up-regulated by 1.22-fold after exposure to atrazine for 24 h, but  
641 it was not at 8 h. miR-499, which also targeted *dmrt2*, was  
642 up-regulated by 1.46-fold for 8 h and 1.57-fold for 24 h,  
643 respectively. After exposure to atrazine for 24 h, miR-202x, and  
644 miR-374-y, which were predicted to target *smad3*, were  
645 up-regulated and down-regulated, respectively. *Hsd11b* was  
646 predicted to target miR-216-x and miR-342-y. *Hsd3b* was the  
647 predicted target of let-7-z. *Stat1* was predicted to be the target of  
648 miR-135c and miR-430, *Sfl* of miR-154-y and miR-3958-y, and  
649 *Sox9* of miR-499. These results illustrate the possible roles of  
650 the differentially-expressed miRNAs in PG, after exposure to  
651 atrazine during gonad differentiation.

652 In juvenile ovary, miR-21, which was significantly  
653 up-regulated by 2.18-fold after exposure to atrazine for 24 h,  
654 was predicted to target *AR* and *atm*. MiR-101b, which was  
655 predicted to target *sf1*, was significantly down-regulated by  
656 1.01-fold. MiR-132a, which was significantly up-regulated by  
657 1.08-fold after exposure to atrazine for 8 h, was predicted to  
658 target *AR*, *dmrt2*, *gsdf*, and *atm*. *Smad4* was predicted to target  
659 novel-m0048-5p. *Hsd11b* was predicted to target  
660 novel-m0305-3p. *Hsd3b* was the predicted target of miR-410-x.

661 *Stat1* was predicted to be the target of miR-192, *CYP19A* of  
662 miR-203a and novel-m0527-3p, and *Sox9* of novel-m0011-5p.

663 In juvenile testis, miR-181b, and miR-181c, which were  
664 significantly up-regulated by 1.04-fold and 1.41-fold,  
665 respectively, after exposure to atrazine for 24 h, were predicted  
666 to target *dmrt2* and *atm*. miR-146a, which was predicted to  
667 target *gsdf* was significantly up-regulated by 1.70-fold.  
668 MiR-132a, which was significantly down-regulated by 1.28-fold,  
669 was predicted to target *ER*. *Smad4* was predicted to target  
670 miR-200b. *Hsd11b* was predicted to target novel-m0305-3p.  
671 *Hsd3b* was the predicted target of miR-410-x. *Stat1* was  
672 predicted to be the target of miR-192, *CYP19A* of miR-203b-3p  
673 and novel-m0693-5p, and *Sox9* of novel-m0081-5p. These  
674 results indicate that atrazine promotes the biosynthesis of steroid  
675 hormone by altering the miRNAs.

676 These differentially-expressed miRNAs were also predicted  
677 to be involved in many reproductive biology pathways,  
678 including steroid metabolic processes, *TGF- $\beta$*  receptor  
679 signalling, *Wnt* signalling, and cell differentiation. Moreover  
680 after exposure to atrazine for 24 h, the predicted target genes of  
681 the differentially-expressed miRNAs of PG included *cyp51a1*,  
682 *hsd3*, *smad4*, *lemd3*, *zranb1*, *tbx6*, *grk6*, *ccna1*, *pcna*, *GATA*,

683 *RBMS1* and *prosapip1*, and some of which, such as *cyp51a1* and  
684 *hsd3*, are gonad development-related genes. Many other  
685 miRNAs were also predicted to target genes associated with  
686 reproductive processes. miR-205 and miR-135c were predicted  
687 to target *bcl2* and *notch2*, which belong to the *TGF- $\beta$*  signalling  
688 and Notch signalling pathways, respectively. miR-205 was  
689 predicted to target *pdk1* and *inhibin beta A chain*, which are  
690 related to *TGF- $\beta$*  signalling, and female gonad development,  
691 respectively. Although the predicted target genes need to be  
692 validated experimentally, these results illustrate some of the  
693 possible roles of the differentially-expressed miRNAs in gonad  
694 reproductive processes.

695

## 696 **DISCUSSION**

697 MiRNAs are involved in diverse biogenesis pathways and have  
698 versatile regulatory functions in differentiation, proliferation,  
699 and apoptosis (Bartel 2009). To date only a limited number of  
700 studies have investigated miRNA expression alterations in  
701 response to exposure to endocrine-disrupting chemical in fish  
702 and humans (Avisar-Whiting et al., 2010; Hsu et al., 2009;  
703 Jenny et al., 2012; Tilghman et al., 2012; Veiga-Lopez et al.,  
704 2013). There are only few reports on the miRNA profiling of



705 fish, in response to atrazine exposure, and no reports in common  
706 carp. The investigation into the adverse effects of atrazine  
707 exposure on miRNAs is important to reveal the molecular  
708 mechanism of gonad differentiation. In the present study, we  
709 assessed the potential effects of atrazine on miRNAs in the  
710 reproductive system at two developmental stages (PG and  
711 II-stage gonad) of Yellow River carp. Primordial germ cell  
712 formation is a crucial stage of gonad differentiation, and II-stage  
713 gonad is the stage of evident sex differentiation. Comparative  
714 analysis of miRNA expression profiles at these two important  
715 stages, after exposure to atrazine, is helpful to identify miRNAs  
716 that play important roles in gonad differentiation.

717 In this study, atrazine exposure resulted in significant  
718 expression alterations of various miRNAs. Atrazine exposure for  
719 24 h caused more alterations in the expression of miRNAs than  
720 exposure for 8 h. Atrazine exposure for 24 h caused more  
721 alteration in miRNA expression in juvenile testis than in  
722 juvenile ovary. It is thus clear that acute and short-time exposure  
723 to atrazine during development can produce adverse effects, as  
724 has been suggested before (Kathryn et al., 2016).

725 Several studies in amphibians have suggested that atrazine is  
726 associated with feminization of males in the wild (Hayes et al.,

727 2002; Hayes et al., 2002; Murphy et al., 2006). In field studies,  
728 atrazine has repeatedly been associated with the presence of  
729 feminized secondary sex characteristics in male frogs (McCoy et  
730 al., 2008). In fish, atrazine causes degeneration of interstitial  
731 tissue in the testes (Spano et al., 2004) and feminizes the gonads  
732 of developing male teleost fish (Tillitt et al., 2008). In addition,  
733 embryonic atrazine exposure alters the expression of zebrafish  
734 and human miRNAs known to play a role in angiogenesis,  
735 cancer, neuronal development, differentiation, and maturation  
736 (Sara et.al 2016). In our study, atrazine exposure altered the  
737 expression of carp miRNAs that play a role in gonad  
738 differentiation and gonad development. A number of miRNAs  
739 (including miR-122, let-7, miR-192, miR-21, miR-499,  
740 miR-146, miR-101, miR-128, and miR-124) that are highly  
741 expressed in adult bighead carp and silver carp were  
742 significantly altered in our study (Chi et al., 2011).

743 Our results suggest that miR-21, let-7, miR-430, miR-181a,  
744 and miR- 143 may play important roles in gonad differentiation  
745 and development in Yellow River carp.

746 Several studies suggested that miR-21 may play an important  
747 role in gonad development. A study reported that in cattle  
748 miR-21 was significantly up-regulated in the ovary (relative to

749 testis) suggesting that miR-21 may play a regulatory role in  
750 female physiology (McBride, 2012). A previous study indicated  
751 that miR-21 plays a role in preventing apoptosis in periovulatory  
752 granulosa cells, as they transit into luteal cells (Christenson et al.,  
753 2010). Has-miR-21 was also up-regulated by ovarian steroids in  
754 mouse granulosa cells and human endometrial stromal cells, and  
755 in glandular epithelial cells (Fiedler et al., 2008; Pan et al.,  
756 2007). In this study, atrazine exposure did not change the  
757 expression of miR-21 in the PG after atrazine exposure, but  
758 induced its up-regulation in juvenile ovary and down-regulation  
759 in juvenile testis.

760 The predicted target genes of miR-21 included genes of the  
761 *MAPK*, B-cell receptor, *TGF- $\beta$* , and apoptotic pathways. This  
762 observation suggests that miR-21 may play crucial roles in  
763 ovary development, gonad differentiation (Gangaraju and Lin et  
764 al., 2009), and endocrine regulation (Eshel et al., 2014; Huang et  
765 al., 2011). The predicted target genes of miR-21 in our study  
766 were *AR* and *atm*.

767 Let-7 was another family of miRNAs with altered expression  
768 by atrazine exposure. The let-7 family was first discovered and  
769 characterized in *Caenorhabditis elegans*, and plays an important  
770 role in regulating late developmental events by down-regulating

771 *lin-41*, and possibly other genes (Pasquinelli et al., 2000). *Let-7*  
772 was significantly up-regulated after atrazine exposure in the PG  
773 and juvenile testis. The predicted target genes of *let-7* in our  
774 study were *sox9* and *atm*.

775 The miR-430 family is known to be involved in embryonic  
776 morphogenesis and clearance of maternal mRNAs; it is and  
777 highly expressed during early zebrafish development (Choi et al.,  
778 2007; Giraldez et al., 2005; Giraldez et al., 2006; Inui et al.,  
779 2010). MiR-430 has been shown to target chemokine signalling  
780 to ensure accurate migration of primordial germ cells (Staton et  
781 al., 2011). In our study and miR-430 was down-regulated in PG  
782 but not in juvenile gonad, which indicates that miR-430 has an  
783 important role in early gonad differentiation of Yellow River  
784 carp.

785 Several reports showed that miR-143 is highly expressed in  
786 the juvenile ovary; it is a dominant miRNA in ovaries in cattle,  
787 pigs, and yellow catfish (Li et al., 2009; Lau et al., 2014). In this  
788 study, miR-143 was highly expressed in juvenile ovary, which is  
789 in keeping with previous reports.

790 The miR-181a family is abundantly expressed in the gonads  
791 of tilapia (Hossain et al., 2012), mice (Saunders et al., 2010),  
792 and humans (Sirotkin et al., 2009). It was down-regulated in

793 juvenile ovary in the present study. Overall, above results  
794 suggest that miR-21, let-7, miR-430, miR-181a, and miR- 143  
795 may play important roles in gonad differentiation and  
796 development in Yellow River carp.

797 Differentially expressed miRNAs showed a variety of  
798 expression patterns at different development stages. Among the  
799 8 different expression patterns, two patterns are particularly  
800 worthy of attention, involving miRNAs with expression levels  
801 that either increased or decreased significantly after atrazine  
802 exposure. MiRNAs whose expression either increased or  
803 decreased significantly after atrazine exposure may be direct  
804 regulators of gonad differentiation. Samples with the highest  
805 number of miRNAs with altered expression were the PG and  
806 juvenile ovary exposed to atrazine for 8 h or 24 h. The number  
807 of decreased miRNAs was 1,056 in PG, including miRNAs  
808 which targets were female-biased. Because miRNAs are  
809 negatively correlated with its target genes, this observation  
810 suggests that atrazine promotes the expression of female-biased  
811 genes by decreasing specific miRNAs in PG, which would result  
812 in the differentiation of the gonad to the female phenotype. The  
813 juvenile ovaries exposed to atrazine had the highest number of  
814 up-regulated miRNAs, including miRNAs whose targets are

815 male-biased. It is thus possible that atrazine represses the  
816 expression of male-biased genes by increasing specific miRNAs  
817 in juvenile ovary.

818 The juvenile testis exposed to atrazine had the highest number  
819 of miRNAs with altered expression, indicating that this tissue  
820 was more sensitive to atrazine, possibly leading to the  
821 feminization of males. This observation suggests that these  
822 miRNAs may have an important function in the timing of gonad  
823 differentiation and development.

824 Target-gene prediction showed that many of the genes that we  
825 identified as targets of the miRNAs that we studied were  
826 involved in sex differentiation. Among these predicted genes,  
827 *sox9*, *dmrt*, and *gsdf* have been identified as sex-determining  
828 genes in fish (Diego et al., 2015; Myosho et al., 2012). For  
829 example, *Hsd11b* and *hsd3b* encode key enzymes in the steroid  
830 hormone biosynthesis pathway. These genes may participate in  
831 steroid hormone synthesis, gonad function, and mechanisms of  
832 sex differentiation, and may play a vital role in developmental  
833 timing. However, further studies are needed to confirm the  
834 interactions and functions of miRNA and target genes. In  
835 addition, the results also show that atrazine has oestrogenic  
836 effects down-regulating male-biased genes (such as *dmrt* and

837 *atm*) through specific miRNAs up-regulation, and up-regulating  
838 female-biased genes (such as *foxl2*) through specific miRNAs  
839 down-regulation.

840 Previous studies showed that atrazine exposure can  
841 significantly reduce synthesis, secretion, and the circulating  
842 levels of androgens in fish (Moore et al., 1998; Spano et al.,  
843 2004), amphibians (Hayes et al., 2002; Hayes et al., 2010),  
844 reptiles (Rey et al., 2009), and mammals (Friedmann et al., 2002;  
845 Stoker et al., 2000), and also in birds to a lower extent  
846 (Wilhelms et al., 2006). The endocrine-disrupting effects of  
847 atrazine are primarily due to alterations of the HPG axis (Cooper  
848 et al., 2000; Foradori et al., 2009, 2013; Weber et al., 2013;  
849 Wirbisky et al., 2016a). However, atrazine's mechanism of  
850 action is not well-understood, it has been proposed that atrazine  
851 up-regulate aromatase expression (Caron-Beaudoin et al., 2016;  
852 Sanderson et al., 2000, 2001, 2002). Aromatase up-regulation  
853 leads to increased conversion of androgens into oestrogens  
854 (Laville et al., 2006). In the present study, we analysed genes  
855 that regulate hormone biosynthesis in the HPG axis, including  
856 *ER1*, *ER2*, *AR*, and *CYP19A1*. MiR-122, which targets *ER1* and  
857 *ER2*, was down-regulated by atrazine. MiR-21, which targets *AR*  
858 was up-regulated in PG by atrazine. MiR-203a, which targets

859 *CYP19A1*, was down-regulated in PG by atrazine. Our results  
860 indicate that atrazine can up-regulate aromatase expression  
861 through specific miRNAs, which is consistent with previous  
862 studies.

863 We tested the hypothesis that atrazine has  
864 endocrine-disrupting effects by altering genes of the HPG axis  
865 through its corresponding miRNAs. In the PG, atrazine affects  
866 sex differentiation mainly through altering upstream genes  
867 involved in gonad differentiation. In juvenile ovary or testis,  
868 atrazine affects the gonad development mainly through altering  
869 hormone generation and the expression of hormone receptor  
870 genes. Further studies are needed to investigate the mechanisms  
871 and roles of miRNAs in the regulation of genes during gonad  
872 differentiation and development.

873 In summary, atrazine exposure caused significant alterations  
874 in miRNAs expression at the crucial stages of carp gonad  
875 development. Target genes of differentially-expressed miRNAs  
876 are key factors in early ovary differentiation or play an  
877 important role in the formation of germ cells. In addition, our  
878 results indicate that atrazine up-regulates aromatase expression  
879 through specific miRNAs, supporting the hypothesis that  
880 atrazine has endocrine-disrupting effects, altering the expression



881 of genes of the HPG axis through its corresponding miRNAs.

882

## 883 **COMPETING INTEREST**

884 The authors have declared that no competing interests exist.

885 Luo, X.Y., Sunohara, Y., Matsumoto, H., 2004. Fluazifop-butyl causes  
886 membrane peroxidation in the herbicide-susceptible broad leaf weed  
887 bristly starbur (*Acanthospermum hispidum*). *Pestic. Biochem. Physiol.* 78  
888 (2), 93 - 102.

## 889 **REFERENCES**

- 890 Allen, J.W., Wolf D.C., George M.H., Hester S.D., Sun G.S., Thai F., Delker D.A.,  
891 Moore T., Jones C., Nelson G., Roop B.C., Leavitt S., Winkfield E., Ward W.O.,  
892 Nesnow S., 2006. Toxicity profiles in mice treated with hepatotumorigenic and  
893 non-hepatotumorigenic triazole conazole fungicides: propiconazole, triadimefon,  
894 and myclobutanil, *Toxicol. Pathol.* 34, 853–862.
- 895 Ana L.Z., Sandra M.M., Rocha E., Fontáinhas-Fernandes A.A., Coimbra A.M., 2016.  
896 Development and recovery of histopathological alterations in the gonads of  
897 zebrafish (*Danio rerio*) after single and combined exposure to endocrine  
898 disruptors (17 $\alpha$ -ethinylestradiol and fadrozole). *Aquatic Toxicology.* 175,  
899 90-105.
- 900 Audic S., Claverie J.M., 1997. The significance of digital gene expression profiles.  
901 *Genome Res* 7(10):986–95. doi:10.1101/gr.7.10.986.
- 902 Brennecke J., Hipfner D.R., Stark A., Russell R.B., Cohen S.M., 2003. Bantam  
903 encodes a developmentally regulated microRNA that controls cell proliferation  
904 and regulates the proapoptotic gene hid in *Drosophila*. *Cell.* 113, 25–36.
- 905 Bartel D.P., 2004. MicroRNAs: genomics, biogenesis, mechanism, and function. *Cell.*  
906 116(2), 281–97.
- 907 Bartel, D., 2009. MicroRNAs: Target recognition and regulatory functions. *Cell.* 136,  
908 215-333. [CrossRef] [PubMed]
- 909 Barr D.B., Panuwet P., Nguyen J.V., Udunka S., Needham L.L., 2007. Assessing  
910 exposure to atrazine and its metabolites using biomonitoring. *Environ. Health*  
911 *Perspect.* 115, 1474–1478.
- 912 Chang W., 2013. Zebrafish sex: a complicated affair. *Briefings in functional genomics.*  
913 13, 172-187.
- 914 Chi W., Tong C.B., Gan X.N., He S.P., 2011. Characterization and comparative  
915 profiling of MiRNA transcriptomes in bighead carp and silver carp. *PLoS One.*  
916 6(8), e23549.
- 917 Christenson L.K., 2010. MicroRNA control of ovarian function. *Anim Reprod.* 7,  
918 129–33.
- 919 Choi W.Y., Giraldez A.J., Schier A.F., 2007. Target protectors reveal dampening and

- 920 balancing of Nodal agonist and antagonist by miR-430. *Science*. 318, 271–4.
- 921 Cooper R.L., Stoker T.E., Tyrey L., Goldman J.M., McElroy W.K., 2000. Atrazine  
922 disrupts the hypothalamic control of pituitary-ovarian function. *Toxicol. Sci.* 53,  
923 297–307.
- 924 Caron-Beaudoin E., Denison M.S., Sanderson J.T., 2016. Effects of neonicotinoids on  
925 promoter-specific expression and activity of aromatase (CYP19) in human  
926 adrenocortical carcinoma (H295R) and primary umbilical vein endothelial  
927 (HUVEC) cells. *Toxicol. Sci.* 149, 134–144.
- 928 Corcoran J., Winter M.J., Tyler C.R., 2010. Pharmaceuticals in the aquatic  
929 environment: a critical review of the evidence for health effects in fish, *Crit. Rev.*  
930 *Toxicol.* 40, 287–304.
- 931 Colborn T. 1993. Developmental effects of endocrine-disrupting chemicals in wildlife  
932 and humans, *Environ. Health Perspect* 101:378.
- 933 Cragin L.A., Kesner J.S., Bachand A.M., Barr D.B., Meadows J.W., Krieg E.F., &  
934 Reif J.S., 2011. Menstrual cycle characteristics and reproductive hormone levels  
935 in women exposed to atrazine in drinking water. *Environmental Research*. 111(8),  
936 1293–1301. <http://dx.doi.org/1016/j.envres.2011.09.009>
- 937 Cooper R.L., Laws S.C., Das P.C., Narotsky M.G., Goldman J.M., Tyrey E.L., &  
938 Stoker T.E., 2007. Atrazine and reproductive function: Mode and mechanism of  
939 action studies. *Birth Defects Research Part B: Developmental and Reproductive*  
940 *Toxicology*. 80(2), 98–112. <http://dx.doi.org/10.1002/bdrb.20110>
- 941 Cooper R.L., Stoker T.E., Tyrey L., Goldman J.M., McElroy W.K., 2000. Atrazine  
942 disrupts the hypothalamic control of pituitary-ovarian function. *Toxicol. Sci.* 53,  
943 297–307.
- 944 Devlin R.H., Nagahama Y., 2002. Sex determination and sex differentiation in fish: an  
945 overview of genetic, physiological, and environmental influence. *Aquaculture*.  
946 208, 191–364.
- 947 Diego R., Laia R., Rosa C., Laura S., Francesc P., Paulino M., Ana V., 2015. Gene  
948 expression analysis at the onset of sex differentiation in turbot (*Scophthalmus*  
949 *maximus*). *BMC Genomics*. 16, 937.
- 950 Daniel M.T., Cátia L.M., Vânia P. R., Cancela M.L., Vincent L., 2014. Mir-20a  
951 regulates in vitro mineralization and BMP signaling pathway by targeting BMP-2  
952 transcript in fish. *Archives of Biochemistry and Biophysics*. 543, 23-30.
- 953 Eshel O., Shirak A., Dor L., Band M., Zak T., Markovich-Gordon M., Chalifa-Caspi  
954 V., Feldmesser E., Weller J.I., Seroussi E., Hulata G., Ron M., 2014.  
955 Identification of male-specific amh duplication, sexually differentially expressed  
956 genes and microRNAs at early embryonic development of Nile tilapia  
957 (*Oreochromis niloticus*). *BMC Genomics*. 15, 774.
- 958 EPA, U.S., 2002. Draft Detailed Review Paper on Fish Screening Assays for  
959 Endocrine Disruption. Columbus, Ohio. 16, 695-705.
- 960 Eldridge J.C., Stevens J.T., Breckenridge C.B., 2008. Atrazine interaction with  
961 estrogen expression systems. *Rev. Environ. Contam. Toxicol.* 196, 147–160.
- 962 Freeman J.L., & Rayburn A.L., 2005. Developmental impact of atrazine on  
963 metamorphosing *Xenopus laevis* as revealed by nuclear analysis and morphology.

- 964 Environmental Toxicology. 24(7), 256–263.
- 965 Freeman J.L., & Rayburn A.L., 2005. Developmental impact of atrazine on  
966 metamorphosing *Xenopus laevis* as revealed by nuclear analysis and morphology.  
967 Environmental Toxicology. 24(7), 256–263.
- 968 Foradori C.D., Hinds L.R., Hanneman W.H., Legare M.E., Clay C.M., Handa R.J.,  
969 2009. Atrazine inhibits pulsatile luteinizing hormone release without altering  
970 pituitary sensitivity to a gonadotropin-releasing hormone receptor agonist in  
971 female Wistar rats. Biol. Reprod. 1, 40–45.
- 972 Foradori C.D., Zimmerman A.D., Hinds L.R., Zuloaga K.L., Breckenridge C.B.,  
973 Handa R.J., 2013. Atrazine inhibits pulsatile gonadotropin-releasing hormone  
974 (GnRH) release without altering GnRH messenger RNA or protein levels in the  
975 female rat. Biol. Reprod. 88, 1–7.
- 976 Foradori C.D., Hinds L.R., Hanneman W.H., Legare M.E., Clay C.M., Handa R.J.,  
977 2009. Atrazine inhibits pulsatile luteinizing hormone release without altering  
978 pituitary sensitivity to a gonadotropin-releasing hormone receptor agonist in  
979 female Wistar rats. Biol. Reprod. 1, 40–45.
- 980 Friedmann A., 2002. Atrazine inhibition of testosterone production in rat males  
981 following peripubertal exposure, Reprod. Toxicol. 16 (3), 275–279.
- 982 Fiedler S.D., Carletti M.Z., Hong X., Christenson L.K., 2008. Hormonal regulation of  
983 MicroRNA expression in periovulatory mouse mural granulosa cells. Biol  
984 Reprod. 79, 1030–7.
- 985 Gangaraju VK, Lin HF. 2009. MicroRNAs: key regulators of stem cells. Nat Rev Mol  
986 Cell Bio 10(2):116–25.
- 987 Giraldez A.J., Cinalli R.M., Glasner M.E., Enright A.J., Thomson J.M., Baskerville S.,  
988 Hammond S.M., Bartel D.P., Schier A.F., 2005. MicroRNAs regulate brain  
989 morphogenesis in zebrafish. Science. 308, 833–8.
- 990 Giraldez A.J., Mishima Y., Rihel J., Grocock R.J., Van Dongen S., Inoue K., Enright  
991 A.J., Schier A.F., 2006. Zebrafish MiR-430 promotes deadenylation and  
992 clearance of maternal mRNAs. Science. 312, 75–9.
- 993 Gui J., Zhu Z., 2012. Molecular basis and genetic improvement of economically  
994 important traits in aquaculture animals [J]. Chin Sci Bull. 57(15), 1751–60.
- 995 Gianessi L., & Sankula S., 2003. The value of herbicides in U.S. crop production.  
996 National Center for Food and Agricultural Policy. Retrieved from  
997 <http://www.croplifefoundation.org>
- 998 Grentzinger T., Armenise C., Brun C., Mugat B., Serrano V., Pelisson A., Chambeyron  
999 S., 2012. PiRNA-mediated transgenerational inheritance of an acquired trait.  
1000 Genome Res. 22, 1877–88.
- 1001 Griffiths-Jones S., 2006. MiRBase: the microRNA sequence database. Methods Mol  
1002 Biol. 342, 129–38.
- 1003 Hayes T.B., Khoury V., Narayan A., Nazir M., Park A., Brown T., Gallipeau S., 2010.  
1004 Atrazine induces complete feminization and chemical castration in male African  
1005 clawed frogs (*Xenopus laevis*). Proceedings of the National Academy of Sciences  
1006 of the United States of America. 107(10), 4612–4617.  
1007 <http://dx.doi.org/10.1073/pnas.0909519107>

- 1008 Harries J.E., Runnalls T., Hill E., Harris C.A., Maddix S., Sumpter J.P., Tyler C.R.,  
1009 2000. Development of a reproductive performance test for endocrine disrupting  
1010 chemicals using pair-breeding fathead minnows(*Pimephales promelas*). Environ.  
1011 Sci. Technol. 34, 3003– 3011.
- 1012 Hwang H.W., Mendell J.T., 2006. MicroRNAs in cell proliferation, cell death, and  
1013 tumori-genesis. Br J Cancer. 94, 776–80.
- 1014 Hossain M.M., Sohel M.M., Schellander K., Tesfaye D., 2012. Characterization and  
1015 importance of microRNAs in mammalian gonad functions. Cell Tissue Res. 349,  
1016 679–90.
- 1017 Huang J., Ju Z., Li Q., Hou Q., Wang C., Li J., Li R., Wang L., Sun T., Hang S., Gao  
1018 Y., Hou M., Zhong J., 2011. Solexa sequencing of novel and differentially  
1019 expressed microRNAs in testicular and ovarian tissues in Holstein cattle. Int J  
1020 Biol Sci. 7, 1016–26.
- 1021 Hayes T.B., Haston K., Tsui M., Hoang A., Haellefe C., Vonk A., 2002.  
1022 Atrazine-induced hermaphroditism at 0.1 ppb in American leopard frogs (*Rana*  
1023 *pipiens*): laboratory and field evidence, Environ. Health Perspect 111:568–575.
- 1024 Haye T.B., Haston K., Tsui M., Hoang A., Haellefe C., Vonk A., 2002. Feminization  
1025 of male frogs in the wild, Nature. 419, 895–896.
- 1026 Huang J., Ju Z., Li Q., Hou Q., Wang C., Li J., Li R., Wang L., Sun T., Hang S., Gao  
1027 Y., Hou M., Zhong J., 2011. Solexa sequencing of novel and differentially  
1028 expressed microRNAs in testicular and ovarian tissues in Holstein cattle. Int J  
1029 Biol Sci. 7, 1016–26.
- 1030 He L., Hannon G.J., 2004. MicroRNAs: small RNAs with a big role in gene regulation.  
1031 Nat Rev Genet. 5, 522–31.
- 1032 Hayes T.B., Khourya V., Narayana A., Nazira M., Parka A., Browna T., Adamea  
1033 L., Chana E., Buchholzb D., Stuevea T., Gallipeau S., 2010. Atrazine induces  
1034 complete feminization and chemical castration in male African clawed frogs  
1035 (*Xenopus laevis*), Proc. Natl. Acad. Sci. U.S.A. 107(10), 4612–4617.
- 1036 Ijiri S., Kaneko H., Kobayashi T., Wang D.S., Sakai F., Paul-Prasanth B., Nakamura  
1037 M., Nagahama Y., 2008. Sexual dimorphic expression of genes in gonads during  
1038 early differentiation of a teleost fish, the Nile tilapia *Oreochromis niloticus*. Biol  
1039 Reprod. 78(2), 333–41.
- 1040 Izzotti A., Pulliero A., 2014. The effects of environmental chemical carcinogens on  
1041 the microRNA machinery. Int J Hyg Environ Health. 217, 601–627.
- 1042 Inui M., Martello G., Piccolo S., 2010. MicroRNA control of signal transduction. Nat  
1043 Rev Mol Cell Biol. 11, 252–63.
- 1044 Ji P.F., Liu G.M., Xu J., Wang X.M., Li J.T., Zhao Z.X., Zhang X.F., Zhang Y., Xu P.,  
1045 Sun X.W., 2012. Characterization of common carp transcriptome: sequencing,  
1046 De novo assembly, annotation and comparative genomics. PLoS One. 7, e35152.
- 1047 Jiang Y.L., Feng S.S., Zhang S.H., Liu H., Feng J.X., Mu X.D., Sun X.W., Xu P., 2016.  
1048 Transcriptome signatures in common carp spleen in response to *Aeromonas*  
1049 *hydrophila* infection. Fish & Shellfish Immunology. 57, 41–8.
- 1050 Jardim M.J., Fry R.C., Jaspers I., Dailey L., Diaz-Sanchez D., 2009. Disruption of  
1051 microRNA expression in human airway cells by diesel exhaust particles is linked

- 1052 to tumorigenesis-associated pathways. *Environ Health Perspect.* 117, 1745–1751.
- 1053 Jia Y.F., Nan P., Zhang W.W., Wang F., Zhang R.H., Liang T.T., Ji X.L., Du Q.Y.,
- 1054 Chang Z.J., 2017. Transcriptome analysis of three critical periods of ovarian
- 1055 development in Yellow River carp (*Cyprinus carpio*). *Theriogenology.* 105,
- 1056 15-26.
- 1057 Kucka M., Pogrmic-Majkic K., Fa S., Stojilkovic S.S., Kovacevic R., 2012. Atrazine
- 1058 acts as an endocrine disrupter by inhibiting cAMP-specific phosphodiesterase-4.
- 1059 *Toxicol. Appl. Pharmacol.* 265, 19–26.
- 1060 Karmaus A.L., Zacharewski T.R., 2015. Atrazine mediated disruption of
- 1061 steroidogenesis in BLTK1 murine Leydig cells. *Toxicol. Sci.* 148, 544–554.
- 1062 Krol J., Loedige I., Filipowicz W., 2010. The widespread regulation of microRNA
- 1063 biogenesis, function and decay. *Nat Rev Genet.* 11, 597–610.
- 1064 Kanehisa M., Araki M., Goto S., Hattori M., Hirakawa M., Itoh M., Katayama
- 1065 T., Kawashima S., Okuda S., Tokimatsu T., Yamanishi Y., 2008. KEGG for linking
- 1066 genomes to life and the environment. *Nucleic Acids Res.* 36, D480–4.
- 1067 Klattenhoff C., Theurkauf W., 2008. Biogenesis and germline functions of piRNAs.
- 1068 *Development.* 135, 3–9.
- 1069 Kawaoka S., Mitsutake H., Kiuchi T., Kobayashi M., Yoshikawa M., Suzuki Y.,
- 1070 Sugano S., Shimada T., Kobayashi J., Tomari Y., Katsuma T., 2012. A role for
- 1071 transcription from a piRNA cluster in de novo piRNA production. *RNA.* 18,
- 1072 265–73.
- 1073 Kobayashi A., Stewart CA., Wang Y., Fujioka K., Thomas N.C., Jamin S.P., Behringer
- 1074 R.R., 2011.  $\beta$ -Catenin is essential for Müllerian duct regression during male
- 1075 sexual differentiation. *Development* epub.
- 1076 Kathryn L.G., Russart, Turk R., 2016. Atrazien alters expression of reproductive and
- 1077 stress genes in the developing hypothalamus of the snapping turtle, *Chelydra*
- 1078 *serpentina*. *Toxicology.* 1-9, 366-367.
- 1079 Li J., Wu Z., Cheng F., Li W., Liu G., Tang Y., 2014. Computational prediction of
- 1080 microRNA networks incorporating environmental toxicity and disease etiology.
- 1081 *Sci Rep.* 4, 5576. 43, 204–11.
- 1082 Li M.W.M., Mruk D.D., Cheng C.Y., 2009. Mitogen-activated protein kinases in male
- 1083 reproductive function. *Trends Mol Med.* 15, 159–68.
- 1084 Lau K., Lai K.P., Bao J.Y., Zhang N., Tse A., Tong A., Li J.W., Lok S., Kong Y.C.,
- 1085 Lui W.Y., Wong A., Wu R.S., 2014. Identification and expression profiling of
- 1086 microRNAs in the brain, liver and gonads of marine medaka (*Oryzias*
- 1087 *melastigma*) and in response to hypoxia. *PLoS One.* 9, e110698.
- 1088 Laville N., Bataguer P., Brion F., Hinfrey N., Casellas C., Porcher J., Ait-Aissa S.,
- 1089 2006. Modulation of aromatase activity and mRNA by various selected
- 1090 pesticides in the human choriocarcinoma Jeg-3 cell line. *Toxicology.* 228,
- 1091 98–108.
- 1092 Mei J., Gui J.F., 2015. Genetic basis and biotechnological manipulation of sexual
- 1093 dimorphism and sex determination in fish. *Sci China Life Sci.* 8(2), 124–36.
- 1094 Murphy M.B., Hecker M., Coady K.K., Tompsett A.R., Jones P.D., Du Preez L.H.,
- 1095 Everson G.J., Solomon K.R., Carr, J.A., Smith E.E., Kendall R.J., Van Der Kraak

- 1096 G., Giesy J.P., 2006. Atrazine concentrations, gonad gross morphology and  
1097 histology in ranid frogs collected in Michigan agricultural areas, *Aquat. Toxicol.*  
1098 76 (3–4), 230–245.
- 1099 McCoy K.A., Bortnick L.J., Campbell C.M., Hamlin H.J., Guillette Jr L.J., St. Mary  
1100 C.M., 2008. Agriculture alters gonad form and function in the toad *Bufo marinus*,  
1101 *Environ. Health Perspect.* 116 (11), 1526–1532.
- 1102 McBride D., Carre W., Sontakke S.D., Hogg C.O., Law A., Donadeu F.X., Clinton M.,  
1103 2012. Identification of miRNAs associated with the follicular-luteal transition in  
1104 the ruminant ovary. *Reproduction.* 144, 221–33.
- 1105 Myosho T., Otake H., Masuyama H., Matsuda M., Kuroki Y., Fujiyama A., Naruse K.,  
1106 Hamaguchi S., Sakaizumi M., 2012. Tracing the emergence of a novel  
1107 Sex-determining gene in Medaka, *Oryzias luzonensis*. *Genetics.* 191, 163.
- 1108 Moore A., Waring C., 1998. Mechanistic effects of a triazine pesticide on reproductive  
1109 endocrine function in mature male Atlantic salmon (*Salmo salar L.*) parr.,  
1110 *Pesticide Biochem. Physiol.* 62, 41–50.
- 1111 Nagahama Y., 1997. 17 alpha, 20 beta-dihydroxy-4-pregnen-3-one, a maturation  
1112 inducing hormone in fish oocytes: mechanisms of synthesis and action. *Steroids.*  
1113 62(1), 190–6.
- 1114 Pogrmic K., Fa S., Dakic V., Kaisarevic S., Kovacevic R., 2009. Atrazine oral  
1115 exposure of peripubertal male rats downregulates steroidogenesis gene  
1116 expression in Leydig cells. *Toxicol Sci.* 111, 189–197.
- 1117 Pogrmic-Majkic K., Fa S., Dakic V., Kaisarevic S., Kovacevic R., 2010. Upregulation  
1118 of peripubertal rat Leydig cell steroidogenesis following 24 h in vitro and in vivo  
1119 exposure to atrazine. *Toxicol Sci.* 118, 52–60.
- 1120 Pogrmic-Majkic K., Samardzija D., Fa S., Hrubik J., Glisic B., Kaisarevic S., Andric  
1121 N., 2014. Atrazine enhances progesterone production through activation of  
1122 multiple signaling pathways in FSH-stimulated rat granulosa cells: evidence for  
1123 premature luteinization. *Biol Reprod.* 91, 1–10.
- 1124 Pedersen I.M., Cheng G., Wieland S., Volinia S., Croce C.M., Chisari F.V., David M.,  
1125 2007. Interferon modulation of cellular microRNAs as an antiviral mechanism.  
1126 *Nature.* 449, 919–22.
- 1127 Pombinho A.R., Laize V., Molha D.M., Marques S.M., Cancela M.L., 2004. *Cell*  
1128 *Tissue Res.* 315, 393–406.
- 1129 Pearson W.R., 1991. Searching protein sequence libraries: comparison of the  
1130 sensitivity and selectivity of the Smith-Waterman and FASTA algorithms.  
1131 *Genomics.* 11, 635–50.
- 1132 Pan Q., Luo X., Toloubeydokhti T., Chegini N., 2007. The expression profile of  
1133 micro-RNA in endometrium and endometriosis and the influence of ovarian  
1134 steroids on their expression. *Mol Hum Reprod.* 13, 797–806.
- 1135 Pasquinelli A.E., Reinhart B.J., Slack F., Martindale M.Q., Kuroda M.I., Maller B.,  
1136 Hayward D.C., Ball E.E., Degnan B., Muller P., Spring J., Srinivasan A.,  
1137 Fishman M., Finnerty J., Corbo J., Levine M., Leahy P., Davidson E.,  
1138 Ruvkun G., 2000. Conservation of the sequence and temporal expression of let-7  
1139 heterochronic regulatory RNA. *Nature.* 408, 86–9.

- 1140 Qiu C., Chen G., Cui Q., 2012. Towards the understanding of microRNA and  
1141 environmental factor interactions and their relationships to human diseases. *Sci*  
1142 *Rep.* 2, 318.
- 1143 Rager J.E., Smeester L., Ilona J., Sexton K.G., Fry R.C., 2011. Epigenetic changes  
1144 induced by air toxics: Formaldehyde exposure alters miRNA expression profiles  
1145 in human lung cells. *Environ Health Perspect.* 119, 494–500.
- 1146 Ro S., Song R., Park C., Zheng H., Sanders K.M., Yan W., 2007. Cloning and  
1147 expression profiling of small RNAs expressed in the mouse ovary. *RNA.* 13,  
1148 2366–80.
- 1149 Rey F., González M., Zayas M., Stoker C., Durando M., Luque E.H, Muñoz-de-Toro.,  
1150 M., 2009. Prenatal exposure to pesticides disrupts testicular histoarchitecture and  
1151 alters testosterone levels in male *Caiman latirostris*, *Gen. Comp. Endocrinol.* 162  
1152 (3), 286–292.
- 1153 Ray P.D., Yosim A., Fry R.C., 2014. Incorporating epigenetic data into the risk  
1154 assessment process for the toxic metals arsenic, cadmium, chromium, lead, and  
1155 mercury: strategies and challenges. *Front Genet* 16 July Vol. 5, Article 201.
- 1156 Solomon K.R., Carr J.A., Du Preez L.H., Giesy J.P., Kendall R.J., Smith E.E., Van  
1157 Der Kraak G.J., 2008. Effects of atrazine on fish, amphibians, and aquatic  
1158 reptiles: a critical review. *Crit. Rev. Toxicol.* 38, 721–772.
- 1159 Smith I.E., 1999. Aromatase inhibitors: a dose-response effect? *Endocr. Relat. Cancer.*  
1160 6, 245–249.
- 1161 Seralini G.E., Moslemi S., 2001. Aromatase inhibitors: past, present and future. *Mol.*  
1162 *Cell. Endocrinol.* 178, 117–131.
- 1163 Sonnenschein C., Soto A.M., 1998. An updated review of environmental estrogen and  
1164 androgen mimics and antagonists. *J. Steroid Biochem. Mol. Biol.* 65, 143– 150.
- 1165 Sheehan D.J., Hitchcock C.A., Sibley C.M., 1999. Current and emerging azole  
1166 antifungal agents, *Clin. Microbiol. Rev.* 12, 40–79.
- 1167 Suzawa M., Ingraham H., 2008. The herbicide atrazine activates endocrine gene  
1168 networks via non-steroidal NR5A nuclear receptors in fish and mammalian cells,  
1169 *PLoS One.* 3, 2117.
- 1170 Spano L., 2004. Effects of atrazine on sex steroid dynamics, plasma vitellogenin  
1171 concentration and gonad development in adult goldfish (*Carassius auratus*),  
1172 *Aquat. Toxicol (Amsterdam)* 66 (4):369–379.
- 1173 Wirbisky S.E., Webera G.J., Schlotman K.E., Sepúlveda M.S., Freemana J.L., 2016.  
1174 Embryonic atrazine exposure alters zebrafish and human miRNAs associated  
1175 with angiogenesis, cancer, and neurodevelopment. *Food and Chemical*  
1176 *Toxicology.* 98, 25-33.
- 1177 Staton A.A., Knaut H., Giraldez A.J., 2011. MiRNA regulation of Sdf1 chemokine  
1178 signaling provides genetic robustness to germ cell migration. *Nat Genet.*
- 1179 Saunders L.R., Sharma A.D., Tawney J., Nakagawa M., Okita K., Yamanaka S.,  
1180 Willenbring H., Verdin E., 2010. miRNAs regulate SIRT1 expression during  
1181 mouse embryonic stem cell differentiation and in adult mouse tissues. *Aging-Us.*  
1182 2(7), 415–31.
- 1183 Sirotkin A.V., Ovcharenko D., Grossmann R., Laukova M., Mlyncek M., 2009.

- 1184 Identification of microRNAs controlling human ovarian cell steroidogenesis via  
1185 a genome-scale screen. *J Cell Physiol.* 219(2), 415–20.
- 1186 Stoker T.E., Laws S.C., Guidici D.L., Cooper R.L., 2000. The effect of atrazine on  
1187 puberty in male Wistar rats: an evaluation in the protocol for the assessment of  
1188 pubertal development and thyroid function. *Toxicol Sci.* 58 (1), 50–59.
- 1189 Sanderson J.T., Seinen W., Giesy J.P., van den Berg M., 2000. 2-Chloro-s-triazine  
1190 herbicides induce aromatase (CYP19) activity in H295R human adrenocortical  
1191 carcinoma cells: a novel mechanism for estrogenicity? *Toxicol. Sci.* 54, 121–127.
- 1192 Sanderson J.T., Letcher R.J., Heneweer M., Giesy J.P., van den Berg M., 2001. Effects  
1193 of chloro-s-triazine herbicides and metabolites on aromatase activity in various  
1194 human cell lines and on vitellogenin production in male carp hepatocytes.  
1195 *Environ. Health Perspect.* 109, 1027–1031.
- 1196 Sanderson J.T., Boerma J., Lansbergen G.W.A., van den Berg M., 2002. Induction and  
1197 inhibition of aromatase (CYP19) activity by various classes of pesticides in  
1198 H295R human adrenocortical carcinoma cells. *Toxicol. Appl. Pharmacol.* 182,  
1199 44–54.
- 1200 Taxvig C., 2008. Endocrine-disrupting properties in vivo of widely used azole  
1201 fungicides, *Int. J. Androl.* 31, 170.
- 1202 Tevera-Mendoza L., Ruby S., Brousseau P., Fournier M., Cyr D., Marcogliese D.,  
1203 2002. Response of the amphibian tadpole (*Xenopus laevis*) to atrazine during  
1204 sexual differentiation of the testis. *Environ Toxicol Chem.* 21, 527–531.
- 1205 Trentacoste S.V., Friedmann A.S., Youker R.T., Breckenridge C.B., Zirkin B.R., 2001.  
1206 Atrazine effects on testosterone levels and androgen-dependent reproductive  
1207 organs in peripubertal male rats. *J. Androl.* 22, 142–148.
- 1208 Tillitt D.E., Papoulias D.M., Whyte J.J., Richter C.A., 2008. Atrazine reduces  
1209 reproduction in fathead minnow, *Marine Environ. Res.* 66 (1), 51–151.
- 1210 U.S. Environmental Protection Agency. 1994. Atrazine, simazine, and cyanazine.  
1211 Notice of initiation of special review. *Fed Reg.* 59, 60412–60443.
- 1212 Weber G.J., Sepúlveda M.S., Peterson S.M., Lewis S.L., Freeman J.L., 2013.  
1213 Transcriptome alterations following developmental atrazine exposure in  
1214 zebrafish are associated with disruption of neuroendocrine and reproductive  
1215 system function, cell cycle, and carcinogenesis. *Toxicol. Sci.* 132, 458–466.
- 1216 Wirbisky S.E., Weber G.J., Sepúlveda M.S., Lin T.S., Jannasch A.S., Freeman J.L.,  
1217 2016a. An embryonic atrazine exposure results in reproductive dysfunction in  
1218 adult zebrafish and morphological alterations in their offspring. *Sci. Rep.* 6,  
1219 21337. <http://dx.doi.org/10.1038/srep21337>.
- 1220 Wirbisky S.E., Sepúlveda M.S., Weber G.J., Jannasch A.S., Horzmann K.A., Freeman  
1221 J.L., 2016b. Embryonic atrazine exposure elicits alterations in genes associated  
1222 with neuroendocrine function in adult male zebrafish. *Toxicol. Sci.* 153,  
1223 149–164.
- 1224 Wang F., Jia Y.F., Wang P., Yang Q.W., Du Q.Y., Chang Z.J., 2017. Identification and  
1225 profiling of *Cyprinus carpio* microRNAs during ovary differentiation by deep  
1226 sequencing. *BMC Genomics.* 18, 333.
- 1227 Wirbisky S.E., Weber G.J., Schlotman K.E., Sepúlveda M.S., Freeman J.L., 2016.



- 1228 Embryonic atrazine exposure alters zebrafish and human miRNAs associated  
1229 with angiogenesis, cancer, and neurodevelopment. *Food Chem Toxicol.* 98(Pt A),  
1230 25-33.
- 1231 Wilhelms K.W., Cutler S.A., Proudman J.A., Anderson L.L., Scanes C.G., 2006.  
1232 Effects of atrazine on sexual maturation in female Japanese quail induced by  
1233 photostimulation or exogenous gonadotropin, *Environ. Toxicol. Chem.* 25 (1),  
1234 233–240.
- 1235 Weber G.J., Sepúlveda M.S., Peterson S.M., Lewis S.L., Freeman J.L., 2013.  
1236 Transcriptome alterations following developmental atrazine exposure in  
1237 zebrafish are associated with disruption of neuroendocrine and reproductive  
1238 system function, cell cycle, and carcinogenesis. *Toxicol. Sci.* 132, 458–466.
- 1239 Wirbisky S.E., Weber G.J., Sepúlveda M.S., Lin T.S., Jannasch A.S., Freeman J.L.,  
1240 2016a. An embryonic atrazine exposure results in reproductive dysfunction in  
1241 adult zebrafish and morphological alterations in their offspring. *Sci. Rep.* 6,  
1242 21337. <http://dx.doi.org/10.1038/srep21337>.
- 1243 Xu P., Vernooij S.Y., Guo M., Hay B.A., 2003. The *Drosophila* microRNA mir-14  
1244 suppress cell death and is required for normal fat metabolism. *Curr Biol.* 13,  
1245 790–5.
- 1246 Xu P., Zhang X.F., Wang X.M., 2014. Genome sequence and genetic diversity of the  
1247 common carp, *Cyprinus carpio*. *Nat Genet.* 46(11), 1212–9.
- 1248 Xu J., Zhao Z.X., Zhang X.F., Zheng X.H., Li J.T., Jiang Y.L., Kuang Y.Y., Zhang Y.,  
1249 Feng J.X., Li C.J., Yu J.H., Li Q., Zhu Y.Y., Liu Y.Y., Xu P., Sun X.W., 2014.  
1250 Development and evaluation of the first high-throughput SNP array for common  
1251 carp (*Cyprinus carpio*). *BMC Genomics.* 15, 307.
- 1252 Zhang B., Pan X., 2009. RDX induces aberrant expression of microRNAs in mouse  
1253 brain and liver. *Environ Health Perspect.* 117, 231–240.
- 1254 Zhu Y.P., Xue W., Wang J.T., Wan Y.M., Wang S.L., Xu P., Zhang Y., Li J.T., Sun  
1255 X.F., 2012. Identification of common carp (*Cyprinus carpio*) microRNAs and  
1256 microRNA-related SNPs. *BMC Genomics.* 13, 413.

1257

1258

1259 **TABLE I. Distribution of sequenced clean reads**

| Type        | PG-CK       |      | PG-A8h      |      | PG-A24h     |      | <u>IIC-CK</u> |       | IIC-A8h     |       |
|-------------|-------------|------|-------------|------|-------------|------|---------------|-------|-------------|-------|
|             | Total reads | %    | Total reads | %    | Total reads | %    | Total reads   | %     | Total reads | %     |
| tRNA        | 127738      | 2.16 | 102015      | 1.84 | 90495       | 1.08 | 28725         | 0.47  | 76379       | 1.08  |
| snoRNA      | 491         | 0.01 | 1870        | 0.03 | 3233        | 0.04 | 1316          | 0.02  | 839         | 0.01  |
| rRNA        | 226731      | 3.84 | 486980      | 8.80 | 737066      | 8.84 | 2569896       | 41.84 | 1148476     | 16.31 |
| snRNA       | 3487        | 0.06 | 10178       | 0.18 | 15628       | 0.19 | 2201          | 0.04  | 1516        | 0.02  |
| Clean reads | 10281292    | 100  | 10086295    | 100  | 11985647    | 100  | 10080133      | 100   | 11724632    | 100   |

| Type        | IIC-A24h    |      | <u>IIX-CK</u> |      | IIX-A8h     |      | IIX-A24h    |       |
|-------------|-------------|------|---------------|------|-------------|------|-------------|-------|
|             | Total reads | %    | Total reads   | %    | Total reads | %    | Total reads | %     |
| tRNA        | 184690      | 2.72 | 38943         | 0.58 | 188272      | 2.79 | 30837       | 0.37  |
| snoRNA      | 206         | 0.00 | 161           | 0.00 | 3072        | 0.05 | 8262        | 0.10  |
| rRNA        | 362576      | 5.34 | 57360         | 0.85 | 297759      | 4.42 | 4185775     | 50.12 |
| snRNA       | 4984        | 0.07 | 611           | 0.01 | 10599       | 0.16 | 32132       | 0.38  |
| Clean reads | 11604659    | 100  | 11502749      | 100  | 11030073    | 100  | 11282882    | 100   |

1260

1261

1262

1263

1264

1265

1266

1267

1268

1269

1270

1271

1272

1273

1274

1275

1276

1277

1278

1279

1280

1281

1282

1283

1284

1285

**Fig. 1. Length distribution of miRNA sequences from Yellow River carp in primordial gonad control (PG-CK), primordial gonad exposed to atrazine for 8 h (PG-A8h), primordial gonad exposed to atrazine for 24 h (PG-A24h), juvenile ovary control (IIC-CK), juvenile ovary exposed to atrazine for 8 h (IIC-A8h), juvenile ovary exposed to atrazine for 24 h (IIC-A24h), juvenile testis control (IIX-CK), juvenile testis exposed to atrazine for 8 h (IIX-A8h), juvenile testis exposed to atrazine for 24 h (IIX-A24h).**

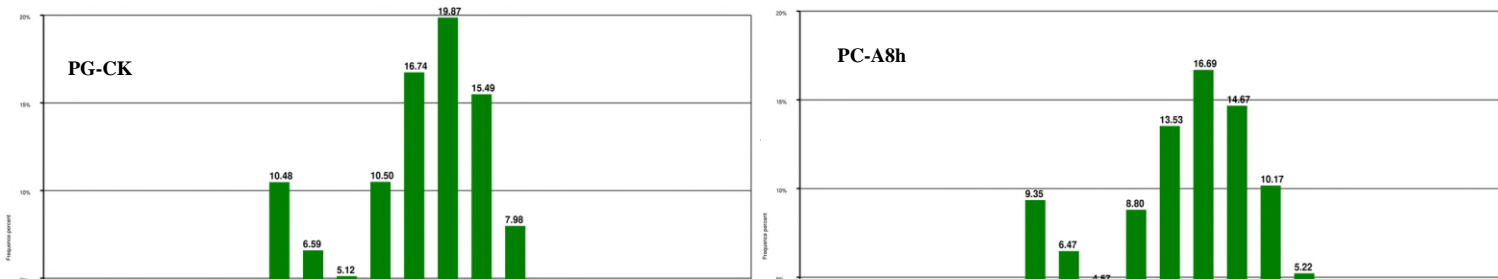

1288  
1289  
1290  
1291  
1292  
1293  
1294  
1295  
1296  
1297  
1298  
1299  
1300  
1301  
1302  
1303  
1304  
1305  
1306  
1307  
1308  
1309  
1310  
1311  
1312  
1313  
1314  
1315  
1316  
1317  
1318  
1319  
1320  
1321  
1322  
1323  
1324  
1325  
1326  
1327

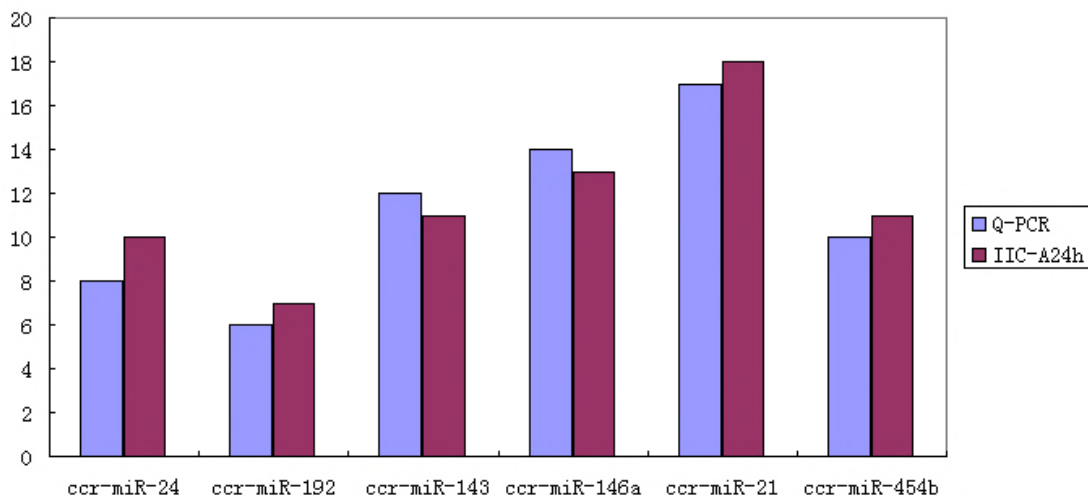

1328  
1329  
1330  
1331  
1332  
1333  
1334

**Fig. 2. Real-time quantitative PCR gene expression analysis of six randomly-selected miRNAs. Gene expression was normalized to the level of U6 snRNA.**

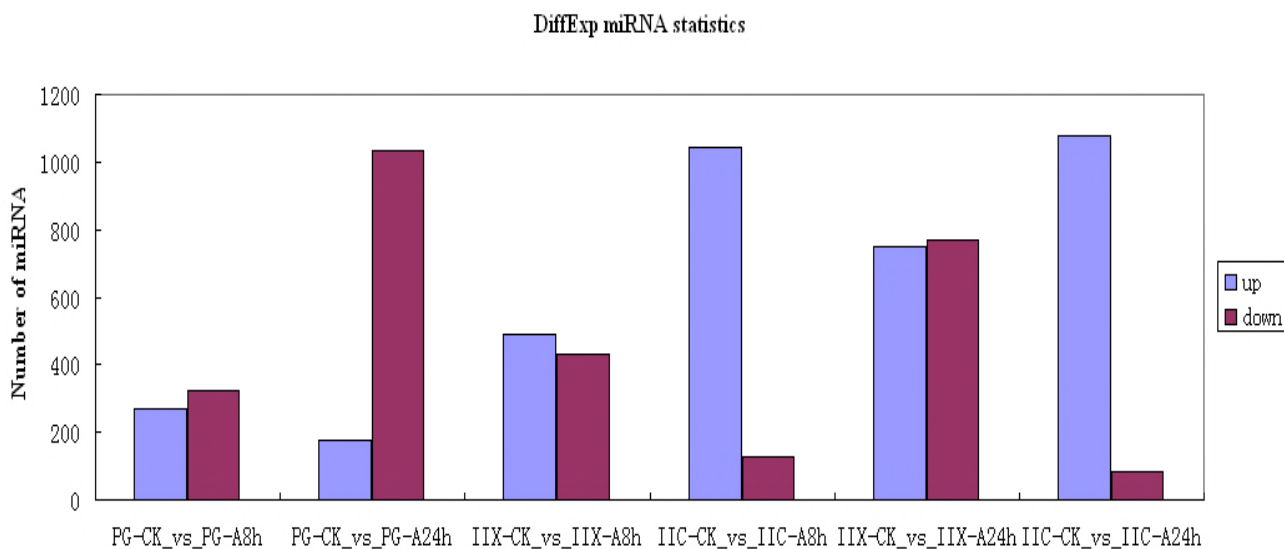

1335  
1336  
1337  
1338  
1339  
1340  
1341  
1342  
1343  
1344  
1345  
1346

**Fig. 3. Differential expression of miRNAs in Yellow River carp. Greater than 2-fold change while  $P < 0.05$**

1347  
1348  
1349  
1350  
1351  
1352  
1353  
1354  
1355  
1356  
1357  
1358  
1359  
1360  
1361  
1362  
1363  
1364  
1365

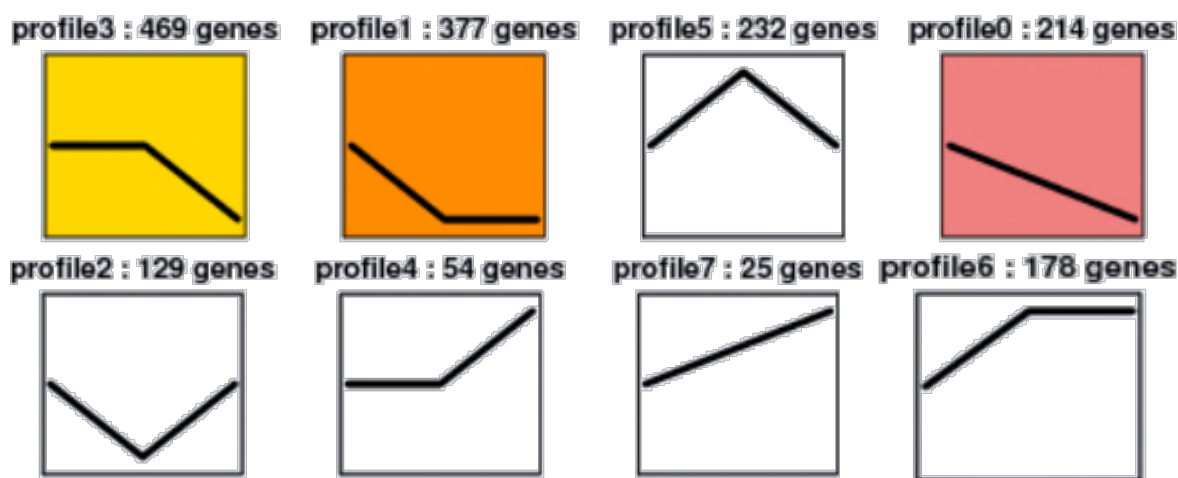

**Fig. 4. Trend analysis of miRNA expression profiles after exposure to atrazine in Yellow River Carp**

1366  
1367  
1368

**TABLE 2. miRNAs with significant expression alterations after atrazine exposure in Yellow River Carp**

| Name         | Sample    | Up or Down      | log <sub>2</sub> (FC) |
|--------------|-----------|-----------------|-----------------------|
| ccr-let-7a   | PG-A24h   | down-regulation | -1.36                 |
| ccr-miR-135c | PG-A24h   | up-regulation   | 2.88                  |
| ccr-miR-122  | PG-A8h    | up-regulation   | 1.48                  |
| ccr-miR-192  | IIIC-A8h  | down-regulation | -3.13                 |
| ccr-miR-146a | IIIC-A24h | up-regulation   | 2.13                  |
| ccr-miR-184  | IIIC-A24h | down-regulation | -13.70                |
| ccr-let-7b   | IIIX-A8h  | up-regulation   | 1.17                  |
| ccr-miR-101a | IIIX-A24h | down-regulation | -1.34                 |
| ccr-miR-205  | IIIX-A24h | down-regulation | -14.27                |
| ccr-miR-193a | IIIX-A24h | up-regulation   | 2.51                  |

1369  
1370
